# Supplementary material
Source: publisher figshare collection journal article supplement (https://tandf.figshare.com/ndownloader/files/17958410)
Supplement: Supplementary file 1 [file 17958410]

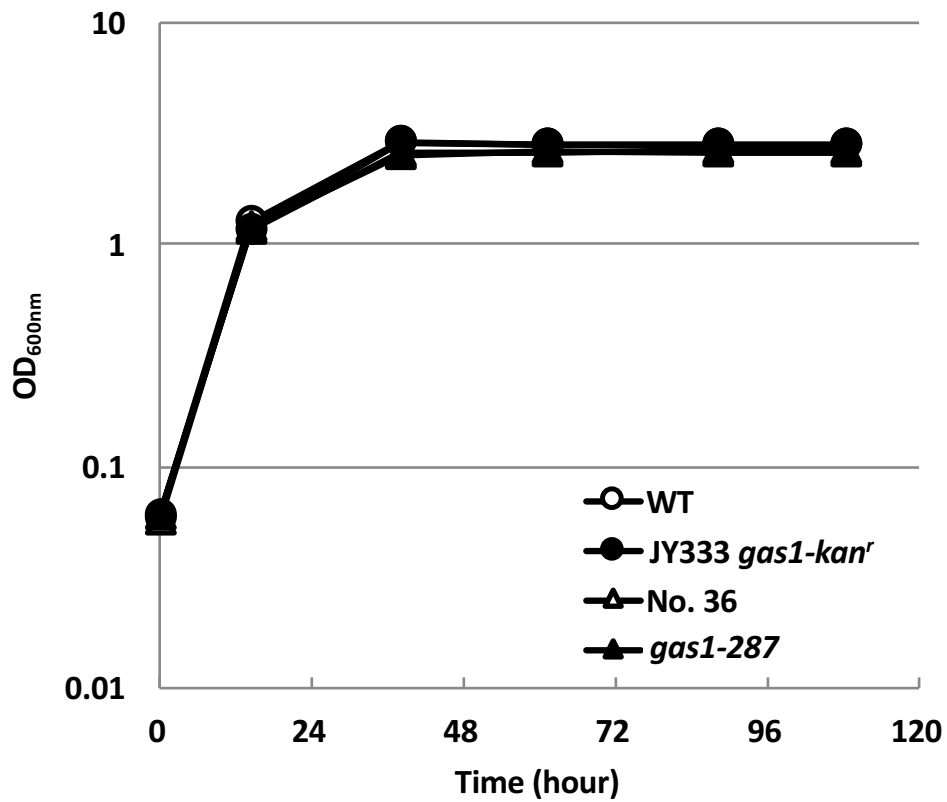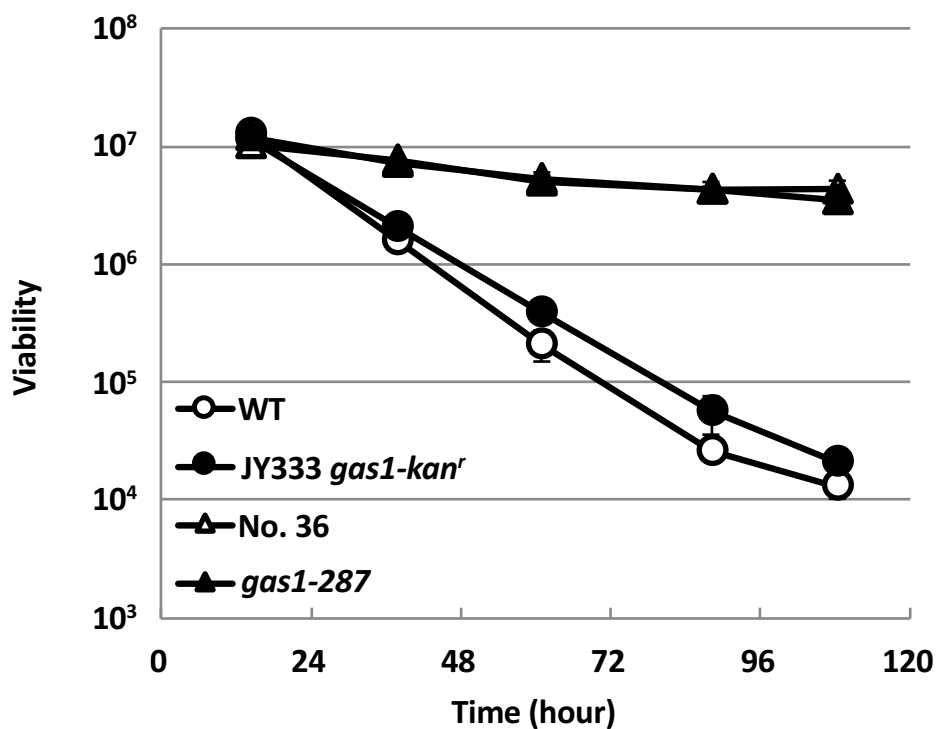

## Supplemental Fig. 1

JY333 *gas1-kan<sup>r</sup>* and *gas1-287* mutant were cultured in SD medium, and viability was measured at each time point.

The results were shown as the means of three independent experiments with standard deviations.

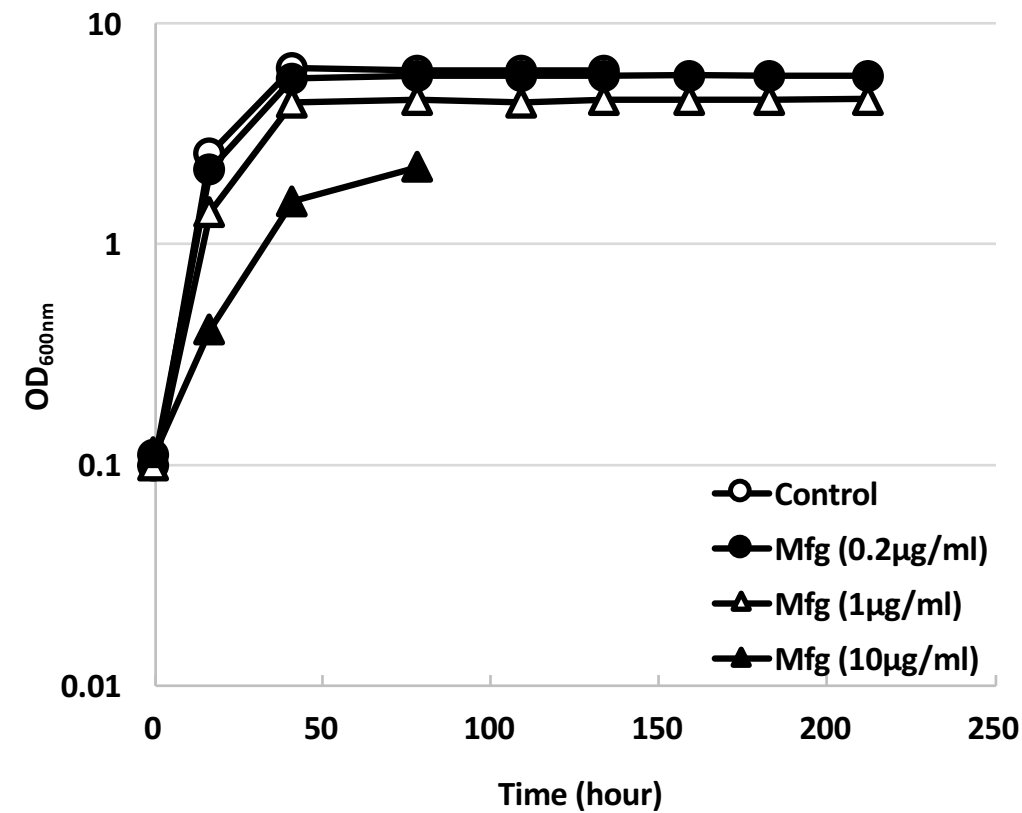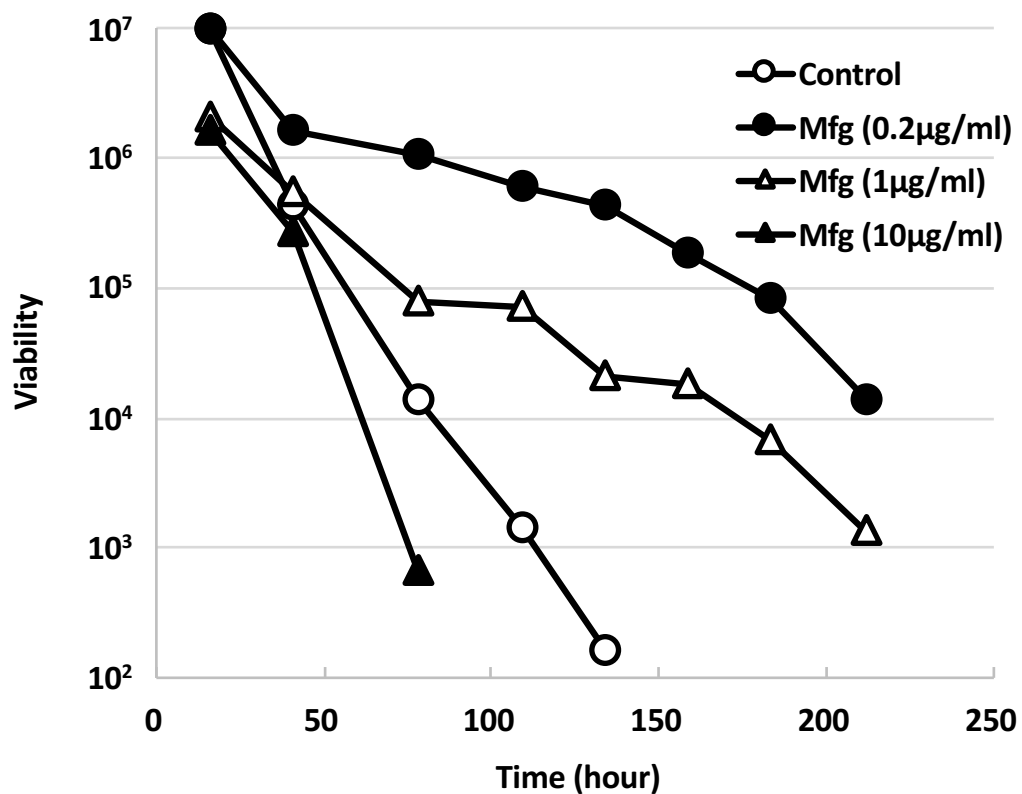

## Supplemental Fig. 2

Wild type strain (JY333) was cultured in SD medium containing each concentration of micafungin, and viability was measured at each time point.
